# Supplementary material for: Urinary Metabolomic Profiling Reveals the Effect of Shenfu Decoction on Chronic Heart Failure in Rats
Source: Molecules. 2015 Jun 30;20(7):11915–29. doi: 10.3390/molecules200711915 (PMC6332052; doi:10.3390/molecules200711915)
Supplement: Supplementary file 1 [file molecules-20-11915-s001.xlsx]

## Sheet: Supplementary Materials  S1
Compounds name and Binbase ID	xylitol	xanthurenic acid	xanthosine	valine	uric acid	urea	uracil	UDP-glucuronic acid	tyrosine	tryptophan	thymine	threonine	threonic acid	threitol	taurine	sulfuric acid	sucrose	succinic acid	stearic acid	spermidine	sorbitol	serine	saccharic acid	ribose	ribonic acid	ribitol	putrescine	pseudo uridine	propane-1,3-diol NIST	pipecolic acid	pimelic acid	phosphoric acid	phenol	phenaceturic acid	pentadecanoic acid	pelargonic acid	parabanic acid	palmitic acid	oxoproline	orotic acid	ornithine	oleic acid	octadecanol	noradrenaline	N-hexanoylglycine	N-carbamylglutamate	N-acetyl-D-mannosamine	N-acetyl-D-hexosamine	myristic acid
KEGG ID	C00379	C02470	C01762	C00183	C00366	C00086	C00106	C00167	C00082	C00078	C00178	C00188	C01620	n/a	C00245	C00059	C00089	C00042	C01530	C00315	C00794	C00065	C00818	C00121	C01685	C00474	C00134	C02067	C02457	C00408	C02656	C00009	C00146	C05598	C16537	C01601	C00802	C00249	C01879	C00295	C00077	C00712	D01924	C00547		C05829	C00645	C03136	C06424
SFD	37603	8094	398	2362	60730	49718	19104	22534	4030	1911	5210	2792	10485	11927	438454	1532	529	76309	217015	454	11158	2056	5025	1979	1881	2942	39006	159701	944	2294	4443	423249	107187	175518	5152	48288	4127	28706	91975	5365	8614	602	1034	8242	2913	3763	5055	10359	3826
SFD	36705	6890	342	2068	62741	727157	19113	8364	3383	1713	1618	1648	10357	10259	316603	7247	181	29037	207082	330	11453	1444	4266	3658	8213	13700	25754	137280	1127	4045	2893	518717	66869	224593	4168	21247	5600	28532	70803	5627	8251	558	1046	8233	1240	2953	5074	9632	3388
SFD	39064	6777	402	1694	56173	1650147	12632	1593	3571	2014	3964	1521	11090	11506	341262	85807	577	32515	147109	337	10014	1127	3998	1344	7556	16159	31220	156843	803	2300	3625	73998	50955	254455	3006	46479	4459	20846	72844	4457	6718	624	628	11253	3771	3078	5624	10853	2372
SFD	41993	7608	527	1171	72413	928144	23263	3619	4133	1739	11516	780	10635	12921	251435	310	220	34349	237767	685	15464	1883	4565	4212	10100	11692	32697	163874	1212	5763	3554	18676	111088	265891	6573	46653	4500	27605	78095	6747	9728	514	804	8611	2590	4685	4187	11233	4032
SFD	45657	7136	465	2200	68165	457137	14451	12438	3529	1986	8832	1658	10400	11414	598023	3192	145	48459	191706	287	15228	1986	4521	4119	8687	55555	30896	175424	1039	5053	3634	445525	87647	260855	5387	64257	4216	26590	80201	7550	9271	485	1156	8677	2543	7003	6774	13737	3407
SFD	27943	8204	507	1767	47626	85096	26421	3927	3517	1307	4139	2168	7856	10760	367177	13573	207	40607	193053	359	8414	1326	4280	932	6955	2404	45296	130177	1132	4033	3355	503221	92338	294496	6039	23025	5040	25648	74714	3602	6450	457	1063	8135	1923	4136	3215	9447	3294
CHF	47287	17329	974	5281	97977	173720	47017	4730	7611	3603	7095	2741	14788	18227	141990	160545	927	55690	447694	874	20662	1485	5563	3855	13732	73741	60925	294472	2377	2870	4548	1198163	127483	396991	13075	50726	6719	56852	107637	8914	10275	1620	2289	21408	4284	3052	8251	20457	7406
CHF	45565	6436	860	5138	45644	3638039	24869	2613	6604	3043	8245	1203	14259	13940	336948	7504	932	26909	626690	1394	15271	1450	3824	2565	8165	59513	33680	166837	3449	4716	5178	184728	189779	420000	15788	174134	10037	85251	3385	8316	13566	1920	3019	9925	1776	1968	5242	13924	11272
CHF	74400	14144	1733	3933	77823	4562583	55447	4604	8886	3237	8656	3067	14688	18426	410302	147797	425	78010	602681	1334	18094	1691	3942	4723	13448	68385	53757	237164	2302	4027	6728	984736	187095	379091	16395	181632	10857	72403	134791	9667	7518	2149	2795	18103	5530	4248	6210	17568	11698
CHF	33732	8853	1518	2700	50639	9635819	46143	5064	3210	1576	7567	3129	9282	13442	297901	10267	324	70640	844628	1831	9514	2202	3268	3627	8332	39665	38912	132078	4288	3430	5446	651620	51578	303324	12805	259580	9827	101232	55042	7555	17811	2607	4195	10151	1819	2121	6675	14960	14323
CHF	46738	13174	837	3074	66538	4772602	36313	3842	9059	2809	7274	5302	9281	14037	198878	2869	564	21730	1291330	1170	14984	2459	5123	3313	9990	10502	43741	184910	2024	3236	4628	462484	53056	362486	23155	238743	9981	129259	119465	8376	10024	1819	3740	13806	2980	2690	6071	14617	14020
CHF	53680	12645	473	11482	84222	2095422	30840	2624	11209	3020	7665	3169	14013	14857	478324	25762	82	126981	380778	1132	19852	3766	5844	12156	8272	60471	76454	223035	1656	12032	6816	68959	39271	409118	10530	85024	5834	40856	110668	9573	24337	1415	1955	16102	4522	2207	8195	20742	6554
Sham	48502	10868	1539	2490	65714	794190	30477	6016	5099	2457	4031	1715	12860	13466	433830	45689	283	40045	351703	427	17234	1718	3895	1759	12344	20732	40529	219579	1142	3169	5447	550742	167263	634000	5244	58062	5322	40184	127446	8160	7649	631	1297	15983	3420	3365	6548	15774	4689
Sham	39021	6666	561	657	22236	1638585	15266	5260	2982	1448	4753	1784	8966	8924	234251	5205	513	24408	249091	561	10455	990	3078	855	6307	13367	26545	130993	1217	2447	2928	434461	46628	195835	5628	69198	3696	32080	65111	4802	6313	724	1124	7127	2607	2703	4376	9171	3847
Sham	70012	7192	508	5331	74819	1098243	18400	3683	4015	2328	4882	2146	12861	12966	654059	24277	322	70630	136059	413	16118	2057	4953	1930	10274	20204	63030	215232	544	2064	7255	159784	198945	821408	4188	36853	6540	19086	165694	6513	19799	601	815	15334	5170	5488	7634	16040	2110
Sham	26816	10680	433	1446	40690	37492	22716	6721	5412	1857	3185	1309	8947	9307	171510	5615	283	39330	228486	860	10005	997	3042	5893	8214	31463	57833	130893	975	1615	4001	531622	32925	186866	4615	52058	4421	30590	82839	4647	5880	691	1577	8785	2077	1656	3876	4545	3462
Sham	24429	3847	251	1	39699	223150	12433	11498	2710	1395	4292	948	7123	8407	343501	9079	403	23285	197506	351	7599	1083	2723	775	6441	10015	24078	26574	460	1770	2387	55584	76205	186492	3785	49329	3457	22566	47822	3876	4033	509	974	7400	754	1816	2984	3485	2796
Sham	29337	6251	313	1688	57218	597190	10888	2492	1769	1532	4313	1515	6541	7969	231854	549	319	21647	121237	262	9516	1059	3011	1678	6862	11723	36453	123519	404	1488	3512	62787	36290	256043	2642	36527	2682	17540	52095	5163	5919	383	754	5995	2099	3383	4840	8711	1845
NC	48527	9309	235	1180	65649	765139	18244	1934	1423	1977	5390	1169	10422	10424	409015	6446	593	23055	166170	117	12939	1452	4265	1638	8956	17629	41468	183951	812	2520	3447	399469	101265	411817	3913	17319	5729	20648	87162	5290	4120	674	839	13685	2558	3272	4035	11636	3071
NC	42336	8995	634	769	72727	1425050	40468	2884	4105	1826	6079	1359	10175	12001	388133	9619	728	61174	198054	349	19890	1025	3437	1005	9174	2323	52897	207425	855	6480	4931	469545	51751	332756	5428	45205	4594	24155	95392	6443	4162	619	1195	17535	1706	3341	4872	11991	3233
NC	45901	8294	426	1651	73163	1069336	31584	3501	4320	1774	2651	1681	13307	10379	466098	12724	411	70373	194243	432	12652	1169	3901	1837	7609	2863	43999	166187	927	3319	3449	478264	99386	285968	4864	17367	5253	21013	84393	6014	8367	787	854	16131	2997	1830	4413	14249	3330
NC	44699	6341	475	807	82763	88172	33843	8399	3450	1812	2731	1444	11184	9810	443882	21867	376	45366	181146	376	10511	1137	3797	1434	7602	2490	45486	157192	1061	1987	3843	503046	64261	301335	4906	56426	5995	26606	76135	5658	4031	822	728	591	3092	2333	3279	8166	2736
NC	30784	4756	389	3022	22087	1135366	14582	1410	2184	1549	1683	1406	6706	5667	196627	6383	1027	32521	172421	356	9219	875	2516	839	5920	10343	20842	103625	692	1620	2388	251464	33450	164762	2959	36581	3946	17903	57717	3467	3236	410	868	3751	1811	2312	3315	7592	2800
NC	26173	4835	123	2764	44159	466773	12681	6591	2501	1376	1125	2487	5767	6256	438672	15716	355	24609	99539	297	3685	1536	2071	622	3140	10745	37359	102703	214	6033	2012	62210	51100	143087	1474	20727	2509	10959	53008	3774	5028	313	454	6728	2213	2207	2704	7337	1560
[truncated: 205 more columns]

## Sheet: Supplementary Materials  S2
	Total Cmpd	Hits	Raw p	Holm adjust	FDR	Impact
Pyrimidine metabolism	41	5	4.9426e-05	0.0024219	0.0022123	0.11995
beta-Alanine metabolism	19	5	0.0001083	0.0051986	0.0022123	0.44444
Fatty acid biosynthesis	43	5	0.00020475	0.0096234	0.0022123	0
Steroid biosynthesis	35	1	0.00022575	0.010384	0.0022123	0.05394
Steroid hormone biosynthesis	70	1	0.00022575	0.010384	0.0022123	0.01746
Biosynthesis of unsaturated fatty acids	42	3	0.00040586	0.017858	0.0033145	0
Purine metabolism	68	6	0.00058054	0.024963	0.0040638	0.02452
Tyrosine metabolism	42	7	0.00069262	0.02909	0.0042423	0.28697
Pantothenate and CoA biosynthesis	15	3	0.0021078	0.086419	0.0092044	0
Histidine metabolism	15	2	0.0021392	0.086419	0.0092044	0
Propanoate metabolism	20	3	0.002267	0.088414	0.0092044	0
Fatty acid elongation in mitochondria	27	1	0.002442	0.092795	0.0092044	0
Fatty acid metabolism	39	1	0.002442	0.092795	0.0092044	0
Ubiquinone and other terpenoid-quinone biosynthesis	3	2	0.0028299	0.10188	0.0099046	0
Glycine, serine and threonine metabolism	32	4	0.0034286	0.12	0.011115	0.53477
Arginine and proline metabolism	44	7	0.0037332	0.12693	0.011115	0.35892
Tryptophan metabolism	41	1	0.0040694	0.13429	0.011115	0
Aminoacyl-tRNA biosynthesis	67	8	0.0040832	0.13429	0.011115	0.13793
Glycolysis or Gluconeogenesis	26	1	0.0047619	0.14762	0.011274	0
Pyruvate metabolism	22	1	0.0047619	0.14762	0.011274	0
Starch and sucrose metabolism	23	6	0.0048319	0.14762	0.011274	0.21616
Phenylalanine, tyrosine and tryptophan biosynthesis	4	1	0.0084227	0.23583	0.017944	0.5
Phenylalanine metabolism	9	1	0.0084227	0.23583	0.017944	0
Primary bile acid biosynthesis	46	3	0.0094744	0.24633	0.019165	0.0965
Amino sugar and nucleotide sugar metabolism	37	4	0.0097781	0.24633	0.019165	0.09917
Glycerolipid metabolism	18	2	0.01633	0.39192	0.030776	0.38569
Alanine, aspartate and glutamate metabolism	24	5	0.032512	0.74778	0.059004	0.51898
Biotin metabolism	5	1	0.035637	0.78401	0.062364	0
Glutathione metabolism	26	6	0.052494	1	0.08695	0.09828
Cysteine and methionine metabolism	28	2	0.053263	1	0.08695	0.02418
Valine, leucine and isoleucine biosynthesis	11	1	0.056784	1	0.08695	0.33333
Valine, leucine and isoleucine degradation	38	1	0.056784	1	0.08695	0
Sphingolipid metabolism	21	1	0.059412	1	0.088218	0
Lysine degradation	20	1	0.067555	1	0.097358	0
Galactose metabolism	26	5	0.10694	1	0.14895	0.07712
Pentose phosphate pathway	19	1	0.10943	1	0.14895	0
Glyoxylate and dicarboxylate metabolism	16	5	0.12411	1	0.16436	0.48149
Ascorbate and aldarate metabolism	9	4	0.14883	1	0.19191	0.8
Methane metabolism	9	2	0.18433	1	0.2258	0.4
Cyanoamino acid metabolism	6	2	0.18433	1	0.2258	0
Fructose and mannose metabolism	19	2	0.18931	1	0.22625	0.03142
Butanoate metabolism	20	3	0.23282	1	0.27162	0
Pentose and glucuronate interconversions	14	3	0.24645	1	0.28084	0.36364
Citrate cycle (TCA cycle)	20	6	0.30778	1	0.34275	0.25349
D-Glutamine and D-glutamate metabolism	5	2	0.34244	1	0.37287	1
Inositol phosphate metabolism	26	2	0.55188	1	0.58787	0.13525
Porphyrin and chlorophyll metabolism	27	2	0.67589	1	0.68998	0
Nitrogen metabolism	9	2	0.67589	1	0.68998	0
Taurine and hypotaurine metabolism	8	1	0.71	1	0.71	0.42857

## Sheet: Supplementary Materials  S3
Name	F value	p value
pentadecanoic acid	29.0934	0
oleic acid	45.62	0
octadecanol	27.6329	0
myristic acid	28.9717	0
lauric acid	35.5022	0
hydroxylamine	30.1909	0
gentisic acid	31.3274	0
catechol	38.8558	0
capric acid	35.4628	0
butyrolactam	30.1735	0
acetophenone	25.5294	0
5-hydroxymethyl-2-furoic acid	72.2398	0
spermidine	29.0343	0
3-hydroxypyridine	29.2939	0
3-hydroxypropionic acid	23.1173	1e-06
inositol allo-	21.1597	2e-06
cholesterol	19.935	3e-06
methylhexadecanoic acid	19.5687	4e-06
fructose	18.8309	5e-06
benzoic acid mixed spec	18.6824	5e-06
palmitic acid	17.2772	9e-06
cellobiotol	17.0364	1e-05
propane-1,3-diol NIST	16.5927	1.2e-05
maltose	15.7029	1.7e-05
4-hydroxyhippuric acid	13.9483	3.9e-05
parabanic acid	13.6735	4.4e-05
glycerol-3-galactoside	13.3516	5.2e-05
stearic acid	12.8822	6.5e-05
conduritol-beta-epoxide	12.7416	7e-05
pelargonic acid	12.3187	8.7e-05
3,4-dihydroxyphenylacetic acid	11.7964	0.000114
azelaic acid	11.2445	0.000154
4-hydroxyphenylacetic acid	10.5478	0.000226
tyrosine	10.5253	0.000229
threitol	10.3578	0.000252
orotic acid	10.1976	0.000276
indole-3-lactate	10.0424	0.000302
2-hydroxyadipic acid	10.0414	0.000302
inosine	10.0204	0.000306
glycerol-alpha-phosphate	9.5061	0.000414
beta-mannosylglycerate	9.44255	0.00043
lactobionic acid	9.27571	0.000476
tryptophan	9.09271	0.000533
ribitol	8.74887	0.000659
lactic acid	8.73935	0.000663
3-hydroxy-3-indoleacetic acid	8.37369	0.000837
5-hydroxy-3-indoleacetic acid	7.78098	0.001233
2,3-dihydroxybutanoic acid	7.73462	0.001272
2-deoxytetronic acid	7.63192	0.001363
dihydro-3-coumaric acid	7.40743	0.001587
erythritol	7.22718	0.001796
adenosine	7.1475	0.001898
uracil	7.07971	0.00199
homovanillic and 4-hydroxymandelic acid - mixed spectrum	6.55824	0.002884
urea	6.28261	0.003527
benzylalcohol	6.06374	0.004151
N-acetyl-D-hexosamine	5.90435	0.004681
lysine	5.77703	0.005158
beta-gentiobiose	5.69414	0.005497
N-acetyl-D-mannosamine	5.53337	0.006225
allantoic acid	5.3505	0.007185
1,2-anhydro-myo-inositol NIST	5.25614	0.007743
thymine	5.1587	0.008369
1-desoxypentitol NIST	5.0776	0.008932
threonine	5.06956	0.00899
xanthurenic acid	4.96969	0.009747
glyceric acid	4.93246	0.010047
xanthosine	4.78265	0.011359
valine	4.7761	0.01142
biuret	4.69311	0.012231
isothreonic acid	4.63517	0.012835
ornithine	4.43698	0.015158
pimelic acid	4.21669	0.018293
arabinose	4.0777	0.02063
erythronic acid lactone	3.91835	0.023718
allantoin	3.87426	0.024658
saccharic acid	3.86936	0.024765
serine	3.84075	0.0254
3-methyl-1-oxobutylglycine	3.68897	0.02908
arabitol	3.54614	0.033077
homogentisic acid	3.53209	0.033502
3-aminoisobutyric acid	3.49888	0.034528
ribose	3.40117	0.037752
mannitol	3.2286	0.044273

## Sheet: Supplementary Materials  S4
	Total Cmpd	Hits	Raw p	Holm adjust	FDR	Impact
Fatty acid biosynthesis	43	5	1.51e-07	8.03e-06	8.03e-06	0
Biosynthesis of unsaturated fatty acids	42	3	5.17e-07	2.69e-05	1.37e-05	0
beta-Alanine metabolism	19	4	2.31e-06	0.00011761	2.81e-05	0.44444
Fatty acid elongation in mitochondria	27	1	2.65e-06	0.00013253	2.81e-05	0
Fatty acid metabolism	39	1	2.65e-06	0.00013253	2.81e-05	0
Steroid biosynthesis	35	1	2.43e-05	0.0011677	0.00017641	0.05394
Steroid hormone biosynthesis	70	1	2.43e-05	0.0011677	0.00017641	0.01746
Purine metabolism	68	7	2.83e-05	0.0013002	0.00017641	0.02452
Tyrosine metabolism	42	8	3e-05	0.001348	0.00017641	0.28832
Aminoacyl-tRNA biosynthesis	67	9	6.27e-05	0.0027586	0.00033229	0.13793
Arginine and proline metabolism	44	6	9.82e-05	0.0042245	0.00047335	0.35892
Phenylalanine, tyrosine and tryptophan biosynthesis	4	1	0.0002581	0.01084	0.0010522	0.5
Phenylalanine metabolism	9	1	0.0002581	0.01084	0.0010522	0
Glutathione metabolism	26	6	0.00032158	0.012863	0.0011653	0.09828
Glycine, serine and threonine metabolism	32	4	0.00032981	0.012863	0.0011653	0.53477
Primary bile acid biosynthesis	46	3	0.00040801	0.015504	0.0013515	0.0965
Pyrimidine metabolism	41	5	0.00053455	0.019778	0.0016666	0.11995
Pantothenate and CoA biosynthesis	15	3	0.00062617	0.022542	0.0017885	0
Tryptophan metabolism	41	3	0.00065569	0.022949	0.0017885	0.17157
Propanoate metabolism	20	3	0.00073142	0.024868	0.0017885	0
Glycerolipid metabolism	18	3	0.00073833	0.024868	0.0017885	0.41129
Glycerophospholipid metabolism	30	1	0.00074242	0.024868	0.0017885	0.06574
Ubiquinone and other terpenoid-quinone biosynthesis	3	2	0.00079203	0.024868	0.0018251	0
Starch and sucrose metabolism	23	5	0.0014904	0.044712	0.0032913	0.21406
Glycolysis or Gluconeogenesis	26	1	0.0018149	0.052633	0.0038476	0
Galactose metabolism	26	6	0.0041316	0.11568	0.008422	0.11441
Valine, leucine and isoleucine biosynthesis	11	1	0.0047509	0.12827	0.0089928	0.33333
Valine, leucine and isoleucine degradation	38	1	0.0047509	0.12827	0.0089928	0
Biotin metabolism	5	1	0.0056983	0.14246	0.010414	0
Methane metabolism	9	2	0.011658	0.2798	0.019932	0.4
Cyanoamino acid metabolism	6	2	0.011658	0.2798	0.019932	0
Pyruvate metabolism	22	2	0.013347	0.29363	0.022106	0
Cysteine and methionine metabolism	28	1	0.018379	0.38595	0.028649	0.02313
Sphingolipid metabolism	21	1	0.018379	0.38595	0.028649	0
Pentose phosphate pathway	19	1	0.019951	0.38595	0.030211	0
Porphyrin and chlorophyll metabolism	27	2	0.03576	0.64368	0.051224	0
Nitrogen metabolism	9	2	0.03576	0.64368	0.051224	0
Amino sugar and nucleotide sugar metabolism	37	3	0.04446	0.71135	0.062009	0.09917
Pentose and glucuronate interconversions	14	4	0.051926	0.77889	0.070566	0.36364
Ascorbate and aldarate metabolism	9	4	0.10042	1	0.13066	0.8
Alanine, aspartate and glutamate metabolism	24	5	0.10107	1	0.13066	0.32594
Selenoamino acid metabolism	15	1	0.10896	1	0.1375	0
Histidine metabolism	15	1	0.12	1	0.14791	0
Lysine degradation	20	1	0.13784	1	0.16603	0
Sulfur metabolism	5	1	0.18486	1	0.21773	0.3
Glyoxylate and dicarboxylate metabolism	16	6	0.19738	1	0.22742	0.48149
D-Glutamine and D-glutamate metabolism	5	2	0.27307	1	0.30792	1
Fructose and mannose metabolism	19	2	0.32531	1	0.35919	0.03142
Citrate cycle (TCA cycle)	20	7	0.45071	1	0.48751	0.29869
Butanoate metabolism	20	5	0.52421	1	0.55566	0
Inositol phosphate metabolism	26	2	0.6575	1	0.68329	0.13525
Taurine and hypotaurine metabolism	8	1	0.7044	1	0.71794	0.42857
Synthesis and degradation of ketone bodies	5	1	0.92983	1	0.92983	0
